# Supplementary figures and images for: Understanding cost data collection tools to improve economic evaluations of health interventions
Source: PubMed Central journal article supplement — Stroke Vasc Neurol. 2019 Dec 1;4(4):214–22. doi: 10.1136/svn-2019-000301 (PMC6979867; doi:10.1136/svn-2019-000301), 2019-12-01

**Appendix Figure 1. Literature screening process**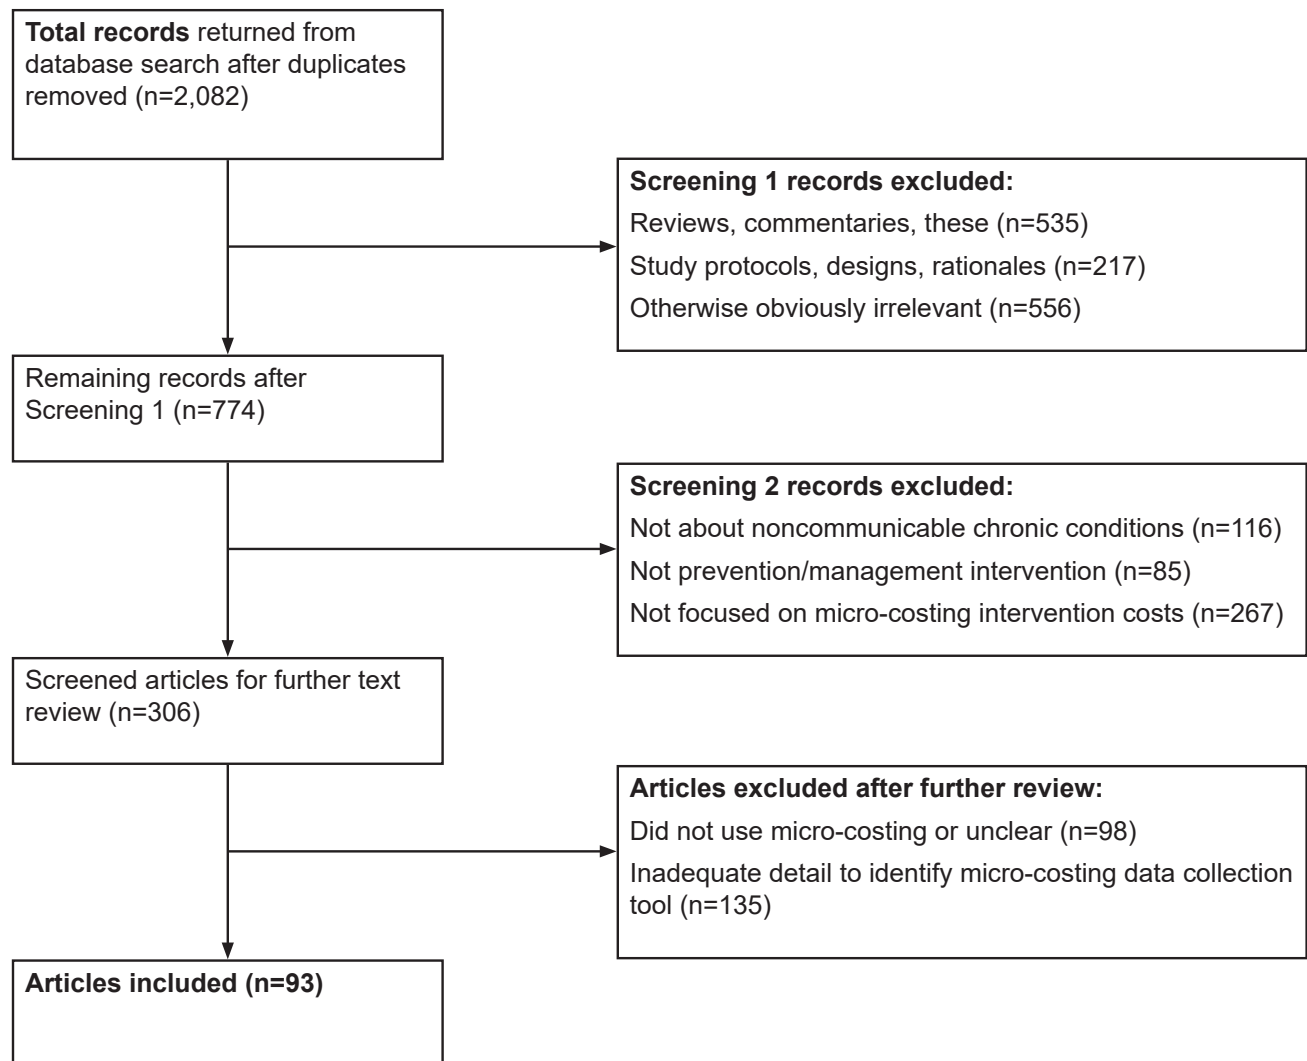

Supplement: svn-2019-000301supp001.pdf [file svn-2019-000301supp001.pdf]
